# Supplementary material
Source: PubMed Central journal article supplement (PMC5012995)
Supplement: 13280_2016_774_MOESM1_ESM.pdf [file 13280_2016_774_MOESM1_ESM.pdf]

**AMBIO**

Electronic Supplementary Material

*This supplementary material has not been peer reviewed.*

Title: Exploring conservation discourses in the Galapagos Islands: a case study of the Galapagos giant tortoises

**Table S1.** Q methodology data collection process (step by step)

| <b>Step and definition</b>                                                                                                                                                                                       | <b>Data collection in the Galapagos Islands, Ecuador</b>                                                                                                                                                                                                                                                                                                                                                                                                                                                                                                                                                                                                                                                                                                                                                 |
|------------------------------------------------------------------------------------------------------------------------------------------------------------------------------------------------------------------|----------------------------------------------------------------------------------------------------------------------------------------------------------------------------------------------------------------------------------------------------------------------------------------------------------------------------------------------------------------------------------------------------------------------------------------------------------------------------------------------------------------------------------------------------------------------------------------------------------------------------------------------------------------------------------------------------------------------------------------------------------------------------------------------------------|
| <b>Concourse</b><br>The body of information about a research topic                                                                                                                                               | <ul style="list-style-type: none"><li>• Collected throughout:<ul style="list-style-type: none"><li>○ 54 interviews (Table S2) conducted in Spanish (the mother tongue of the researcher and the official language Galapagos, Ecuador) in the four inhabited Islands;</li><li>○ Gray and scientific literature revision (Table S3)</li></ul></li><li>• After transcribing the interviews and analyzing the reviewed literature, a total of 420 statements were gathered.</li></ul>                                                                                                                                                                                                                                                                                                                        |
| <b>Q-sample</b><br>The final and reduced concourse capturing specific issues that could be viewed differently among stakeholders                                                                                 | <ul style="list-style-type: none"><li>• A structured approach to reduce the concourse (SARC) from 420 to 60 statements was used.</li><li>• Six separate dimensions within which opinions about the role of the Galapagos giant tortoise for the conservation and development of the archipelago had been brought up: (i) science-conservation, (ii) conservation-tourism, (iii) tourism-economy, (iv) community involvement, (v) policy and management, (vi) giant tortoise typology/representation</li><li>• The final 'Q-sample' contained 60 statements selected and were test-piloted with Charles Darwin Foundation staff (academic and linguistic staff, and doctoral students from Galapagos). The wording of some statements was modified to improve clarity (Watts and Stenner 2012).</li></ul> |
| <b>Q-participants</b><br>A deliberative selection of participants to reflect the widest range of opinions in order to identify all factors that exist in relation to the topic of research                       | <ul style="list-style-type: none"><li>• Q participants were selected based on the relevance of their viewpoints regarding our research questions (role of giant tortoises in conservation and development in the archipelago) and based on their availability while in the Galapagos Islands.</li><li>• Having conducted the stakeholder analysis (SAN) and interviews for collecting the concourse made the identification of Q-participants straightforward.</li><li>• The total number of Q-participants that took part in the research was 28 (n=28).</li></ul>                                                                                                                                                                                                                                      |
| <b>Q-sort</b><br>Ranked statements of the <i>Q-sample</i> according to specific instructions                                                                                                                     | <ul style="list-style-type: none"><li>• Each participant was asked to rank each Q-statement in accordance with her/his preferences (agreement or disagreement) over a quasi-normal distribution (-6 to +6) over a pyramidal shape.</li></ul>                                                                                                                                                                                                                                                                                                                                                                                                                                                                                                                                                             |
| <b>Post-sorting interviews</b><br>Facilitates the interpretation of the identified factors by adding the comments of those individuals whose Q-sorts correlated significantly with the discourse being described | <ul style="list-style-type: none"><li>• Upon completion of the Q-sorts, each participant was asked to explain her/his reaction to the statements that they most agree or disagree on, and to particular statement(s) that they wished to discuss.</li><li>• We audio-recorded the responses and finished by asking demographic information.</li></ul>                                                                                                                                                                                                                                                                                                                                                                                                                                                    |

**Table S2.** Identified stakeholders in Galapagos and number of interviewees by institution and inhabited island. A stakeholder analysis (SAN) approach was used to identify relevant groups of participants that could capture the spectrum of ideas occurring the four inhabited islands, we. Each interview lasted between 45 to 90 minutes. Interviews were transcribed and used to generate the concourse statements. This approach also allowed identifying relevant Q-participants for the Q-sorting phase of the methodology.

| Institution                                         | Number of interviewees per island |               |           |          | Total     |
|-----------------------------------------------------|-----------------------------------|---------------|-----------|----------|-----------|
|                                                     | Santa Cruz                        | San Cristobal | Isabela   | Floreana |           |
| <b>Ministries</b>                                   |                                   |               |           |          |           |
| • <i>Urban development and livelihood (MIDUVI)</i>  | 1                                 |               |           |          | 1         |
| • <i>Agriculture, farming and fisheries (MAGAP)</i> | 1                                 |               |           |          | 1         |
| • <i>Social inclusion (MIES)</i>                    | 1                                 |               | 1         |          | 2         |
| • <i>Tourism</i>                                    |                                   |               | 1         |          | 1         |
| GNP officers                                        |                                   | 1             | 2         | 1        | 4         |
| Tourism chamber                                     | 1                                 |               |           |          | 1         |
| Galapagos biosecurity agency (ABG)                  | 1                                 | 1             | 1         | 1        | 4         |
| Port captaincy                                      | 1                                 | 1             | 1         | 1        | 4         |
| Parrish board                                       | 1                                 |               |           | 1        | 2         |
| <b>NGOs</b>                                         |                                   |               |           |          |           |
| • <i>Conservation International (CI)</i>            | 1                                 |               |           |          | 1         |
| • <i>World Wild Fund for Nature (WWF)</i>           | 1                                 |               |           |          | 1         |
| • <i>FUNDAR</i>                                     | 1                                 |               |           |          | 1         |
| • <i>Isabela Oceanographic Institute (IOI)</i>      |                                   |               | 1         |          | 1         |
| <b>Education centres</b>                            |                                   |               |           |          |           |
| • <i>High school Nacional Galapagos</i>             | 1                                 |               |           |          | 1         |
| • <i>High school Amazonas</i>                       |                                   |               | 1         |          | 1         |
| • <i>High school Ignacio Hernandez</i>              |                                   | 1             |           |          | 1         |
| • <i>School Santa Maria</i>                         |                                   |               |           | 1        | 1         |
| • <i>University San Francisco de Quito (USFQ)</i>   |                                   | 1             |           |          | 1         |
| Galapagos Governing Council (GGC)                   |                                   | 1             | 1         |          | 2         |
| Municipalities                                      | 1                                 | 1             | 1         |          | 3         |
| <b>Locals</b>                                       |                                   |               |           |          |           |
| • <i>Educator/artist</i>                            | 1                                 |               |           |          | 1         |
| • <i>Farmers</i>                                    |                                   |               | 4         | 1        | 5         |
| • <i>Independent</i>                                | 1                                 |               |           |          | 1         |
| • <i>Giant tortoise touristic ranches</i>           | 2                                 |               | 1         |          | 3         |
| • <i>Foreign scientist giant tortoise</i>           | 1                                 |               |           |          | 1         |
| • <i>Local scientist</i>                            | 1                                 |               |           |          | 1         |
| • <i>Retired scientist giant tortoise</i>           | 1                                 |               |           |          | 1         |
| • <i>Fishermen</i>                                  |                                   |               | 1         | 1        | 2         |
| • <i>Fishermen association</i>                      |                                   | 1             |           |          | 1         |
| • <i>Tourism guide</i>                              |                                   |               | 1         |          | 1         |
| • <i>Former park ranger</i>                         | 1                                 |               |           |          | 1         |
| • <i>Park ranger/Artisan</i>                        |                                   |               |           | 1        | 1         |
| • <i>Mayor candidate</i>                            |                                   |               | 1         |          | 1         |
| <b>Total of interviewees</b>                        | <b>20</b>                         | <b>8</b>      | <b>18</b> | <b>8</b> | <b>54</b> |

**Table S3.** Literature revision of gray and scientific literature

| Reference                     | Document type | Journal name or publisher                  |
|-------------------------------|---------------|--------------------------------------------|
| Kenchington 1989              | PRP           | Environmental Conservation                 |
| Milinkovitch et al. 2004      | PRP           | Proceedings of the Royal Society of London |
| Chambers 2006                 | BK            | Oxford University Press                    |
| Marquez et al. 2007           | PRP           | Oryx                                       |
| Rusello et al. 2007           | PRP           | Current Biology                            |
| Gibbs et al. 2008             | PRP           | Restoration Ecology                        |
| Gibbs et al. 2010             | PRP           | Biotropica                                 |
| Blake et al. 2012             | PRP           | Journal of Biogeography                    |
| Blake et al. 2013             | PRP           | Journal of Animal Ecology                  |
| Edwards et al. 2013           | PRP           | Biological Conservation                    |
| Froyd et al. 2014             | PRP           | Ecology Letters                            |
| Hennessy 2013                 | PRP           | Geoforum                                   |
| Nicholls 2012                 | PN            | Nature news                                |
| Cayot 2008                    | LJ            | Galapagos Research                         |
| Jiménez-Uzcátegui et al. 2007 | LR            | Galapagos Report                           |
| Atkinson et al. 2008          | LR            | Galapagos Report                           |
| Galapagos Conservancy 2008    | LR            | Annual Report                              |
| Grenier 2010                  | LR            | Galapagos Report                           |
| MAE, 2012                     | WP            | Ministry of Environment of Ecuador         |
| Wang 2012                     | PN            | Yalle daily news                           |
| Welsh 2012                    | PN            | Life science                               |
| Nava 2010                     | WP            | James Nava                                 |
| El Comercio 2012              | WP            | El Comercio Peru                           |
| El informador 2013            | WP            | El Informador                              |

Document type: peer reviewed publications (PRP), book (BK) local journals (LJ), local reports (LR), press news (PN), web pages (WP)

**Table S4.** Un-rotated factors with Eigen values (EV) >1

| Q-sort | F1    | F2     | F3    | F4    | F5    | F6    | F7    | F8    | F9    |
|--------|-------|--------|-------|-------|-------|-------|-------|-------|-------|
| 1      | 0.27  | 0.50*  | 0.10  | -0.14 | 0.11  | -0.04 | -0.37 | 0.19  | -0.05 |
| 2      | 0.39  | 0.30   | -0.09 | 0.51* | 0.01  | 0.15  | -0.08 | -0.08 | -0.25 |
| 3      | 0.28  | 0.49   | 0.16  | -0.19 | -0.07 | 0.15  | -0.50 | -0.08 | 0.32  |
| 4      | 0.28  | -0.05  | 0.15  | 0.50  | -0.40 | -0.12 | 0.06  | -0.41 | 0.22  |
| 5      | 0.53  | -0.14  | 0.30  | -0.39 | 0.04  | -0.19 | -0.08 | 0.13  | -0.28 |
| 6      | 0.42  | -0.52* | 0.14  | -0.39 | 0.18  | -0.19 | -0.18 | -0.16 | 0.03  |
| 7      | 0.21  | 0.44   | 0.48  | -0.05 | -0.02 | -0.11 | 0.38  | 0.23  | 0.09  |
| 8      | 0.49  | -0.06  | 0.13  | 0.30  | 0.14  | 0.45  | -0.15 | 0.16  | 0.26  |
| 9      | 0.35  | -0.05  | 0.52* | -0.06 | 0.14  | 0.29  | 0.32  | 0.25  | 0.21  |
| 10     | 0.51  | 0.16   | 0.23  | -0.36 | 0.05  | -0.29 | -0.03 | -0.10 | -0.08 |
| 11     | 0.29  | 0.08   | 0.62* | 0.11  | -0.39 | 0.04  | -0.09 | 0.01  | 0.14  |
| 12     | 0.57  | -0.31  | -0.32 | -0.03 | -0.31 | -0.05 | 0.06  | 0.29  | 0.27  |
| 13     | 0.59  | -0.35  | -0.30 | 0.23  | -0.12 | 0.34  | -0.13 | 0.07  | -0.24 |
| 14     | 0.60  | -0.30  | 0.02  | 0.01  | 0.13  | -0.32 | 0.32  | -0.01 | 0.16  |
| 15     | 0.59  | -0.23  | 0.08  | -0.12 | 0.42  | 0.18  | -0.01 | -0.28 | -0.07 |
| 16     | 0.55  | 0.27   | -0.28 | -0.19 | -0.30 | -0.13 | 0.21  | -0.02 | -0.18 |
| 17     | 0.63  | 0.06   | -0.26 | 0.01  | -0.08 | 0.03  | 0.19  | -0.21 | 0.08  |
| 18     | 0.13  | 0.31   | 0.25  | 0.36  | 0.51  | 0.15  | 0.24  | -0.12 | -0.29 |
| 19     | 0.71* | 0.13   | 0.02  | 0.02  | -0.03 | -0.10 | -0.27 | -0.03 | -0.24 |
| 20     | 0.40  | 0.05   | 0.00  | -0.43 | -0.22 | 0.49  | 0.15  | -0.26 | 0.03  |
| 21     | 0.34  | -0.03  | 0.27  | 0.56* | 0.01  | -0.38 | -0.12 | -0.06 | 0.01  |

**Table S4.** Un-rotated factors with Eigen values (EV) >1

|       |             |             |             |             |       |       |       |       |       |
|-------|-------------|-------------|-------------|-------------|-------|-------|-------|-------|-------|
| 22    | 0.37        | 0.26        | -0.37       | -0.14       | 0.22  | 0.06  | 0.03  | 0.33  | 0.15  |
| 23    | 0.53        | -0.47       | 0.02        | 0.24        | 0.07  | 0.04  | 0.07  | 0.30  | -0.12 |
| 24    | 0.60        | -0.36       | 0.09        | 0.13        | -0.20 | -0.08 | -0.19 | 0.27  | -0.14 |
| 25    | 0.65*       | -0.27       | -0.06       | -0.14       | 0.22  | 0.04  | 0.00  | -0.34 | 0.20  |
| 26    | 0.59        | 0.41        | 0.03        | -0.13       | -0.35 | 0.14  | 0.19  | -0.04 | -0.31 |
| 27    | 0.55        | 0.33        | -0.22       | 0.18        | 0.33  | -0.15 | -0.11 | 0.01  | 0.17  |
| 28    | 0.53        | 0.48        | -0.45       | 0.08        | 0.08  | -0.21 | 0.13  | 0.02  | 0.20  |
| EV    | 6.60        | 2.65        | 2.01        | 2.01        | 1.49  | 1.30  | 1.19  | 1.10  | 1.04  |
| % Var | 23.56       | 9.4         | 7.18        | 7.2         | 5.3   | 4.7   | 4.3   | 3.9   | 3.7   |
| HRE   | <b>0.46</b> | <b>0.26</b> | <b>0.32</b> | <b>0.29</b> | 0.17  | 0.22  | -0.19 | -0.14 | 0.09  |

**Table S5.** Parallel analysis takes into account that the first, second and third factors usually are the biggest and calculates EVs that would result from our data set even if all the participants had configured their Q-sorts in an entirely random way (Horn 1965). If the observed EVs exceed the 95th percentile (in this case the fourth factor), EVs have less than 5% chance to occur in circumstances where there are, in reality, no factors in our data set (Watts and Stenner 2012). Hereafter, we extracted the first four factors considered that they would best represent an emerging pattern of responses for a particular point of view.

| Factor   | Actual EV observed | Mean EV for 1000 random data sets | 95th percentile EV for 1000 random sets |
|----------|--------------------|-----------------------------------|-----------------------------------------|
| 1        | 6,60               | 2,56                              | 2,32                                    |
| 2        | 2,65               | 2,29                              | 2,11                                    |
| 3        | 2,01               | 2,08                              | 1,92                                    |
| <b>4</b> | <b>2,01</b>        | <b>1,92</b>                       | <b>1,78</b>                             |
| 5        | 1,49               | 1,19                              | 1,65                                    |
| 6        | 1,30               | 1,77                              | 1,54                                    |
| 7        | 1,19               | 1,64                              | 1,43                                    |
| 8        | 1,10               | 1,52                              | 1,32                                    |
| 9        | 1,04               | 1,41                              | 1,23                                    |
| 10       | 0,98               | 1,31                              | 1,14                                    |

**Table S6.** Varimax rotated factor matrix. \* indicates Q-sorts loading with a factor at > ±0.33, significant at a level of  $p < 0.01$ 

| Q-sort | Loadings |         |         |         |
|--------|----------|---------|---------|---------|
|        | F1       | F2      | F3      | F4      |
| 1      | -0.1243  | 0.3956  | 0.4291  | 0.0245  |
| 2      | -0.0006  | 0.4101  | -0.0012 | 0.5840  |
| 3      | -0.0997  | 0.3566  | 0.4877  | -0.0076 |
| 4      | 0.1698   | -0.0001 | 0.0054  | 0.5724* |
| 5      | 0.5362   | 0.0587  | 0.4750  | -0.1508 |
| 6      | 0.7121*  | -0.1308 | 0.1596  | -0.2558 |
| 7      | -0.1308  | 0.0961  | 0.6377* | 0.1859  |
| 8      | 0.3521   | 0.1340  | 0.1184  | 0.4339  |
| 9      | 0.3055   | -0.1395 | 0.5078* | 0.1740  |
| 10     | 0.3159   | 0.2636  | 0.5357* | -0.1067 |
| 11     | 0.1521   | -0.1632 | 0.5587  | 0.3505  |
| 12     | 0.6201*  | 0.3268  | -0.1872 | 0.0138  |
| 13     | 0.6179*  | 0.2804  | -0.2795 | 0.2651  |
| 14     | 0.6330*  | 0.1462  | 0.0731  | 0.1563  |
| 15     | 0.5988*  | 0.1490  | 0.1908  | 0.0470  |
| 16     | 0.2372   | 0.6420* | 0.1412  | -0.0659 |
| 17     | 0.4074   | 0.5389  | 0.0229  | 0.1281  |
| 18     | -0.1701  | 0.0862  | 0.2369  | 0.4588* |

|           |         |         |         |         |
|-----------|---------|---------|---------|---------|
| 19        | 0.4212  | 0.4591  | 0.2846  | 0.2319  |
| 20        | 0.3203  | 0.2751  | 0.3027  | -0.2724 |
| 21        | 0.1844  | -0.0268 | 0.0927  | 0.6785* |
| 22        | 0.1078  | 0.5823* | -0.0091 | -0.0982 |
| 23        | 0.6650* | -0.0103 | -0.1037 | 0.3243  |
| 24        | 0.6586* | 0.0561  | 0.0518  | 0.2704  |
| 25        | 0.6690* | 0.2486  | 0.0916  | 0.0090  |
| 26        | 0.1695  | 0.5621  | 0.4319  | 0.0913  |
| 27        | 0.1437  | 0.6106* | 0.0814  | 0.2973  |
| 28        | 0.0384  | 0.8325* | -0.0002 | 0.1559  |
| %Variance | 17      | 13      | 9       | 8       |

**Table S7.** Factors Z-scores correlation, % variance explained, number of Q-sorts loading on each factor at  $p < 0.01$  level.

| Z-scores  | F1   | F2   | F3   | F4   | Variance explained (%) | Number of Q-sorts loading |
|-----------|------|------|------|------|------------------------|---------------------------|
| <b>F1</b> | 1.00 | 0.30 | 0.23 | 0.23 | 17                     | 8                         |
| <b>F2</b> |      | 1.00 | 0.25 | 0.18 | 13                     | 4                         |
| <b>F3</b> |      |      | 1.00 | 0.21 | 9                      | 3                         |
| <b>F4</b> |      |      |      | 1.00 | 8                      | 3                         |

## References:

- Atkinson, P., P. Jaramillo, W. Simbaña, A. Guezou, and V. Coronel. 2010. Advances in the conservation of threatened plant species of Galapagos. In: Galapagos Report 2007-2008. Puerto Ayora, Galapagos, Ecuador.
- Horn, J. 1965. A rationale and test for the number of factors in factor analysis. *Psychometrika* 30(2): 179-185.
- Jiménez-Uzcátegui, G., B. Milstead, C. Márquez, J. Zabala, P. Buitrón, A. Llerena, S. Salazar, and B. Fessl. 2007. Galapagos vertebrates: endangered status and conservation actions. In: Galapagos Report 2006-2007. Puerto Ayora, Galapagos, Ecuador.
- Blake, S., M. Wikelski, F. Cabrera, A. Guezou, M. Silva, E. Sadeghayobi, C.B. Yackulic, and P. Jaramillo. 2012. Seed dispersal by Galápagos tortoises. *Journal of Biogeography* 39:1961-1972.
- Blake, S., Yackulic, C. B., Cabrera, F., Tapia, W., Gibbs, J. P., Kuemmeth, F., and Wikelski, M. 2013. Vegetation dynamics drive segregation by body size in Galapagos tortoises migrating across altitudinal gradients. *Journal of Animal Ecology* 82: 310-321.
- Cayot, L.J. 2008. The restoration of giant tortoises and land iguana populations in Galápagos. *Galápagos Res* 65: 39–43.
- Chambers, P. 2004. *A sheltered life: The unexpected history of the giant tortoise*. Oxford University Press.

- El Comercio. 2012. Ecuador: falleció la última tortuga gigante de las Islas Galápagos. Retrieved 7 October 2013 from: <http://elcomercio.pe/ciencias/planeta/ecuador-fallecio-ultima-tortuga-gigante-islas-galapagos-noticia-1432698>
- El Informador. 2013. Al rescate de las tortugas gigantes de Galápagos. Retrieved 7 October 2013 from: <http://informador.com.mx/tecnologia/2013/492108/6/al-rescate-de-las-tortugas-gigantes-de-galapagos.htm>
- Edwards, D.L., E. Benavides, R.C. Garrick, J.P. Gibbs, M.A. Russello, K.B. Dion, C. Hyseni, et al. 2013. The genetic legacy of Lonesome George survives: Giant tortoises with Pinta Island ancestry identified in Galápagos. *Biological Conservation* 157: 225-228.
- Froyd, C. A., E.E. D. Coffey, W.O. Van Der Knaap, J.F.N. Van Leeuwen, A. Tye, and K.J. Willis. 2014. The ecological consequences of megafaunal loss: giant tortoises and wetland biodiversity. *Ecology Letters* 17: 144-154.
- Galapagos Conservancy. 2008. Galapagos Annual Report 2008. Retrieved 12 January, 2012 from: <http://galapagos.org/wp-content/uploads/2012/01/GCAAnnualReport2008small.pdf>
- Gibbs, J. P., C Marquez, and E. J. Sterling. 2008. The role of endangered species reintroduction in ecosystem restoration: tortoise–cactus interactions on Española Island, Galápagos. *Restoration Ecology* 16(1): 88-93.
- Gibbs, J. P., E.J. Sterling, and F. J. Zabala. 2010. Giant Tortoises as Ecological Engineers: A Long-term Quasi-experiment in the Galápagos Islands. *Biotropica* 42(2): 208-214.
- Grenier, 2010. The geographic opening of Galapagos. In: Galapagos Report 2009-2010. Puerto Ayora, Galapagos, Ecuador.
- Hennesy, E. 2013. Producing ‘prehistoric’ life: Conservation breeding and the remaking of wildlife genealogies. *Geoforum* 49: 71-80
- Kenchington, R.A. 1989. Tourism in the Galápagos Islands: the dilemma of conservation. *Environ. Conserv.* 16, 227–232.
- MAE. 2012. Estudio científico demuestra la existencia de tortugas gigantes con genes de la especie de la isla Pinta. Ministerio de Ambiente del Ecuador. Retrieved 14 August 2013 from: <http://ambiente.gob.ec/estudio-cientifico-demuestra-la-existencia-de-tortugas-gigantes-con-genes-de-la-especie-de-la-isla-pinta/>
- Márquez, C., D.A. Wiedenfeld, S. Landázuri, and J. Chávez. 2007. Human-caused and natural mortality of giant tortoises in the Galapagos Islands during 1995-2004. *Oryx* 41(03): 337-342.
- Milinkovitch, M.C., D. Monteyne, J.P. Gibbs, T.H., Fritts, W. Tapia, H.L. Snell, R. Tiedmann, A. Caccone, and J. R. Powell. 2004. Genetic analysis of a successful

repatriation programme: giant Galápagos tortoises. *Proceedings of the Royal Society of London* 271: 341–345.

Nava, J. 2010. Tortugas gigantes de las Islas Galapagos. Retrieved 7 October 2013 from: <http://jamesnava.com/26/10/2010/tortugas-gigantes-de-las-islas-galapagos/>

Nicholls, H. 2012. The Legacy of Lonesome George. Nature news. Retrieved November 15, 2014 from: <http://nature.com/news/the-legacy-of-lonesome-george-1.11017>

Russello, M. A., L.B. Beheregaray, J.P. Gibbs, T. Fritts, N. Havill, J.R. Powell, and A. Caccone. 2007. Lonesome George is not alone among Galápagos tortoises. *Current Biology* 17(9): 317-318.

Wang, C. 2012. Galapagos tortoise back from extinction? Yale daily news. Retrieved 7 October 2013 from: <http://yaledailynews.com/blog/2012/01/24/galapagos-tortoise-back-from-extinction>

Watts, S. and P. Stenner. 2012. *Doing Q Methodological Research: Theory, Method & Interpretation*. SAGE Publications.

Welsh, J. 2012. Extinct' Galapagos Tortoise Reappears. Live science. Retrieved 7 October 2013 from: <http://livescience.com/17807-galapagos-tortoise-reappears.html>
